# Supplementary material for: SnSe2/Ag2Se heterostructures with an accumulation layer for rapid and sensitive detection of NO2
Source: Royal Society of Chemistry journal article supplement (doi:10.1039/d3nj02803h), 2023-01-01
Supplement: d3nj02803h1.pdf [file d3nj02803h1.pdf]

## Supporting information

### **SnSe<sub>2</sub>/Ag<sub>2</sub>Se heterostructures with an accumulation layer for rapid and sensitive detection of NO<sub>2</sub>**

Junpeng Mao,<sup>a</sup> Dongmin Yin,<sup>a</sup> Wen Lu,<sup>a</sup> You Wang,<sup>\*a</sup> Zhenze Zhou,<sup>a</sup> Weixun Hao,<sup>b</sup> Xiangqun Chen<sup>\*a</sup> and Juanyuan Hao<sup>\*a</sup>

<sup>a</sup> *School of Materials Science and Engineering, Harbin Institute of Technology, Harbin 150001, P. R. China.*

<sup>b</sup> *State Key Laboratory of Efficient and Clean Coal-fired Utility Boilers, Harbin Boiler Company Limited, Harbin 150046, P. R. China.*

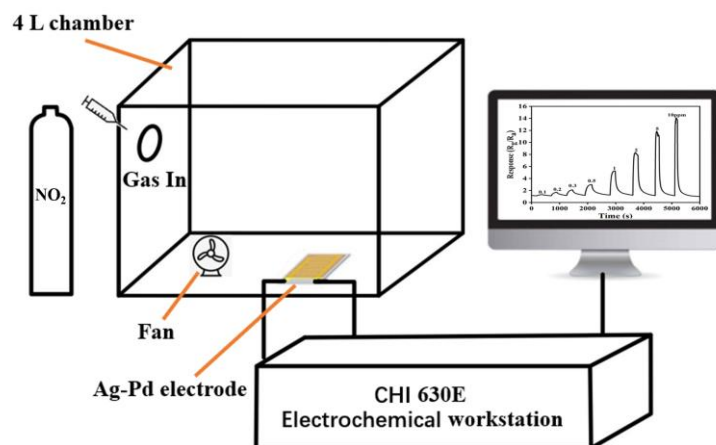

**Fig. S1** Schematic diagram of the sensor measurement.

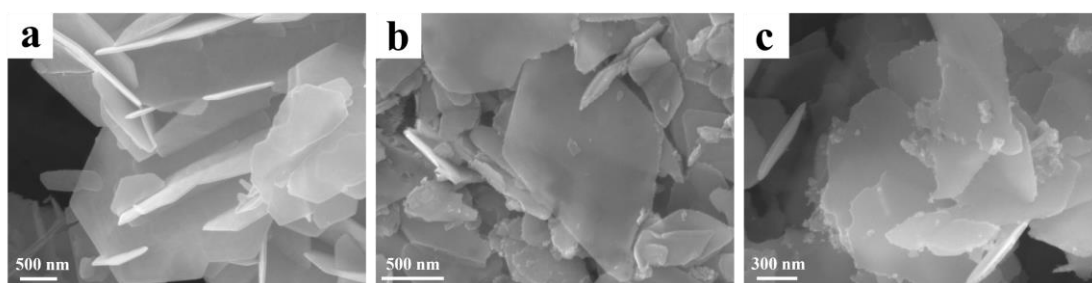

**Fig. S2** SEM images of (a) pristine  $\text{SnSe}_2$  nanosheets, (b) 3%  $\text{SnSe}_2/\text{Ag}_2\text{Se}$  heterostructures, and (c) 9%  $\text{SnSe}_2/\text{Ag}_2\text{Se}$  heterostructures.

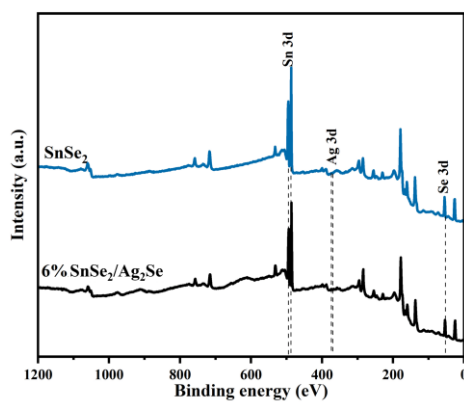

**Fig. S3** The full XPS survey spectra of pure  $\text{SnSe}_2$  and 6%  $\text{SnSe}_2/\text{Ag}_2\text{Se}$ .

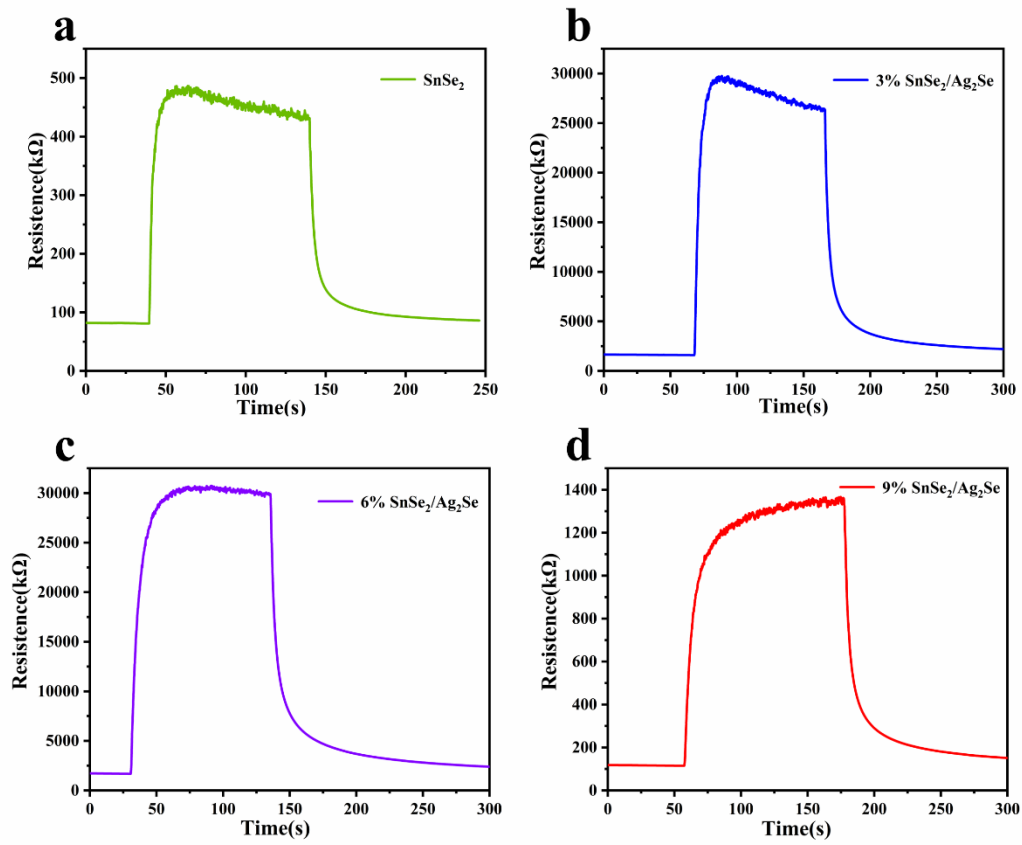

**Fig. S4** Resistance variations to 5 ppm NO<sub>2</sub> of (a) SnSe<sub>2</sub>, (b) 3% SnSe<sub>2</sub>/Ag<sub>2</sub>Se, (c) 6% SnSe<sub>2</sub>/Ag<sub>2</sub>Se, and (d) 9% SnSe<sub>2</sub>/Ag<sub>2</sub>Se.

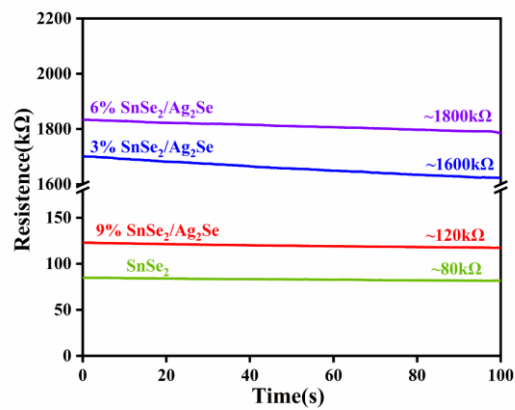

**Fig. S5** Resistances of the pure SnSe<sub>2</sub> and SnSe<sub>2</sub>/Ag<sub>2</sub>Se heterostructures.

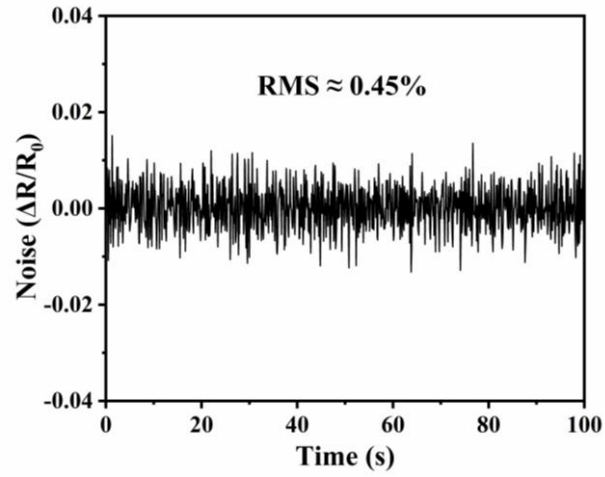

**Fig. S6** Experimentally recorded noise of response for the 6% SnSe<sub>2</sub>/Ag<sub>2</sub>Se sensor. The result indicates that the root-mean-square (RMS) value of background noise is about 0.45%.

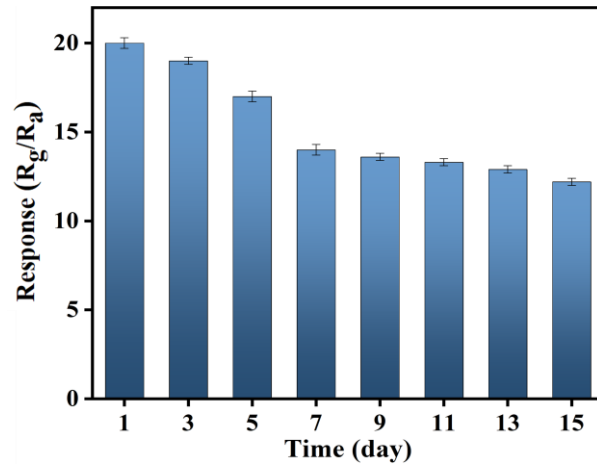

**Fig. S7** Long-term stability test toward 5 ppm NO<sub>2</sub> for 15 days.
